# Supplementary figures and images for: Predicting outcome in children with dilated cardiomyopathy: the use of repeated measurements of risk factors for outcome
Source: PubMed Central journal article supplement — ESC Heart Fail. 2021 Feb 5;8(2):1472–81. doi: 10.1002/ehf2.13233 (PMC8006605; doi:10.1002/ehf2.13233), 2021-02-05

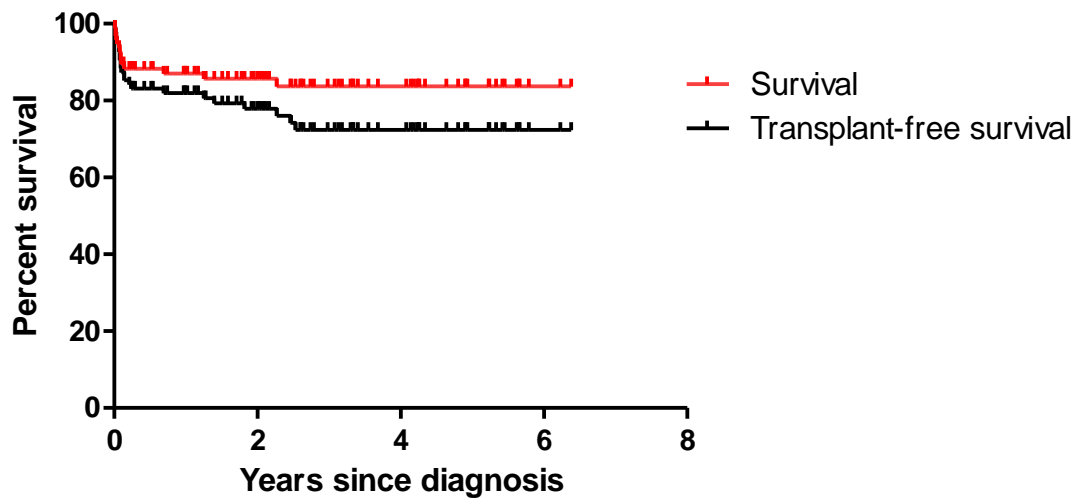

number at risk 96 51 23 2

Supplement: EHF2-8-1472-s001.pdf [file EHF2-8-1472-s001.pdf]
